# Supplementary material for: Association of Bevacizumab Plus Oxaliplatin-Based Chemotherapy With Disease-Free Survival and Overall Survival in Patients With Stage II Colon Cancer: A Secondary Analysis of the AVANT Trial
Source: PubMed Central journal article supplement (PMC7573695; doi:10.1001/jamanetworkopen.2020.20425), 2020-10-19
Supplement: jamanetwopen-e2020425-s002.pdf [file jamanetwopen-e2020425-s002.pdf]

## Supplemental Online Content

Chibaudel B, Henriques J, Rakez M, et al. Association of bevacizumab plus oxaliplatin-based chemotherapy with disease-free survival and overall survival in patients with stage II colon cancer: a secondary analysis of the AVANT Trial. *JAMA Netw Open*. 2020;3(10):e2020425. doi:10.1001/jamanetworkopen.2020.20425

**eTable 1.** Univariate Analysis of Prognostic Factors for Disease-Free Survival and Overall Survival

**eTable 2.** Multivariate Analysis of Prognostic Factors for Disease-Free Survival and Overall Survival

**eFigure 1.** Distribution of Patients According to the Criteria Defining High-Risk Stage II Colon Cancer

**eFigure 2.** Forest Plots for Disease-Free Survival and Overall Survival for FOLFOX4 vs FOLFOX4 with Bevacizumab and Disease-Free Survival and Overall Survival for FOLFOX4 vs XELOX with Bevacizumab

This supplemental material has been provided by the authors to give readers additional information about their work.

**eTable 1.** Univariate Analysis of Prognostic Factors for Disease-Free Survival and Overall Survival

| Variable                               |             | No. (event) | HR   | 95% CI       | P      |
|----------------------------------------|-------------|-------------|------|--------------|--------|
| <b>Disease-free survival</b>           |             |             |      |              |        |
| <b>Arm</b>                             | A           | 192 (38)    | 1    |              |        |
|                                        | B           | 194 (36)    | 0.94 | 0.59 to 1.48 | .78    |
|                                        | C           | 187 (40)    | 1.07 | 0.69 to 1.67 | .76    |
| <b>Gender</b>                          | Male        | 325 (70)    | 1    |              |        |
|                                        | Female      | 248 (44)    | 0.82 | 0.56 to 1.20 | .31    |
| <b>Age, year</b>                       | < 50        | 191 (26)    | 1    |              |        |
|                                        | ≥ 50        | 382 (88)    | 1.69 | 1.09 to 2.61 | .02    |
|                                        | < 60        | 349 (56)    | 1    |              |        |
|                                        | ≥ 60        | 224 (58)    | 1.58 | 1.10 to 2.28 | .01    |
|                                        | < 70        | 498 (85)    | 1    |              |        |
|                                        | ≥ 70        | 75 (29)     | 2.42 | 1.58 to 3.68 | < .001 |
| <b>Primary tumor</b>                   | Left/rectum | 343 (71)    | 1    |              |        |
|                                        | Right       | 211 (38)    | 0.83 | 0.56 to 1.23 | .34    |
| <b>Differentiation</b>                 | Well        | 109 (22)    | 1    |              |        |
|                                        | Moderately  | 374 (74)    | 0.93 | 0.58 to 1.50 | .77    |
|                                        | Poorly      | 67 (12)     | 0.76 | 0.37 to 1.53 | .44    |
| <b>ECOG PS</b>                         | 0           | 464 (85)    | 1    |              |        |
|                                        | 1           | 101 (25)    | 1.61 | 1.03 to 2.51 | .04    |
| <b>T stage</b>                         | T3          | 362 (63)    | 1    |              |        |
|                                        | T4          | 211 (51)    | 1.41 | 0.98 to 2.04 | .07    |
| <b>Perforation or obstruction</b>      | No          | 428 (81)    | 1    |              |        |
|                                        | Yes         | 145 (33)    | 1.23 | 0.82 to 1.85 | .32    |
| <b>Vascular or perineural invasion</b> | No          | 456 (90)    | 1    |              |        |
|                                        | Yes         | 117 (24)    | 1.01 | 0.64 to 1.58 | .97    |
| <b>No. of examined nodes</b>           | ≥ 12        | 328 (55)    | 1    |              |        |
|                                        | < 12        | 243 (58)    | 1.57 | 1.08 to 2.27 | .02    |
| <b>BMI</b>                             | < 30        | 501 (102)   | 1    |              |        |
|                                        | ≥ 30        | 72 (12)     | 0.82 | 0.45 to 1.49 | .52    |
| <b>Overall survival</b>                |             |             |      |              |        |
| <b>Arm</b>                             | A           | 192 (30)    | 1    |              |        |
|                                        | B           | 194 (28)    | 0.92 | 0.55 to 1.55 | .76    |
|                                        | C           | 187 (26)    | 0.85 | 0.50 to 1.44 | .55    |
| <b>Gender</b>                          | Male        | 325 (50)    | 1    |              |        |
|                                        | Female      | 248 (34)    | 0.88 | 0.57 to 1.37 | .58    |
| <b>Age, year</b>                       | < 50        | 191 (16)    | 1    |              |        |
|                                        | ≥ 50        | 382 (68)    | 2.07 | 1.20 to 3.57 | .009   |
|                                        | < 60        | 349 (36)    | 1    |              |        |
|                                        | ≥ 60        | 224 (48)    | 2.05 | 1.33 to 3.16 | .001   |
|                                        | ≤ 70        | 498 (58)    | 1    |              |        |
|                                        | < 70        | 75 (26)     | 3.21 | 2.02 to 5.10 | < .001 |

|                                        |             |          |      |              |     |
|----------------------------------------|-------------|----------|------|--------------|-----|
| <b>Primary tumor</b>                   | Left/rectum | 343 (52) | 1    |              |     |
|                                        | Right       | 211 (28) | 0.84 | 0.53 to 1.32 | .44 |
| <b>Differentiation</b>                 | Well        | 109 (15) | 1    |              |     |
|                                        | Moderately  | 374 (58) | 1.08 | 0.79 to 2.37 | .26 |
|                                        | Poorly      | 67 (8)   | 0.74 | 0.31 to 1.75 | .49 |
| <b>ECOG PS</b>                         | 0           | 464 (64) | 1    |              |     |
|                                        | 1           | 101 (16) | 1.37 | 0.79 to 2.37 | .26 |
| <b>T stage</b>                         | T3          | 362 (46) | 1    |              |     |
|                                        | T4          | 211 (38) | 1.45 | 0.95 to 2.23 | .09 |
| <b>Perforation or obstruction</b>      | No          | 428 (59) | 1    |              |     |
|                                        | Yes         | 145 (25) | 1.25 | 0.79 to 2.00 | .34 |
| <b>Vascular or perineural invasion</b> | No          | 456 (67) | 1    |              |     |
|                                        | Yes         | 117 (17) | 0.92 | 0.54 to 1.57 | .77 |
| <b>No. of examined nodes</b>           | ≥ 12        | 328 (39) | 1    |              |     |
|                                        | < 12        | 243 (45) | 1.75 | 1.14 to 2.69 | .01 |
| <b>BMI</b>                             | < 30        | 501 (72) | 1    |              |     |
|                                        | ≥ 30        | 72 (12)  | 1.25 | 0.68 to 2.31 | .47 |

Abbreviations: HR, hazard ratio; CI, confidence interval; ECOG, Eastern Cooperative Oncology Group; PS, performance status; BMI, body mass index

**eTable 2.** Multivariate Analysis of Prognostic Factors for Disease-Free Survival and Overall Survival

| Variable                     |      | No. (event)            | HR   | 95% CI       | P   |
|------------------------------|------|------------------------|------|--------------|-----|
| <b>Disease-free survival</b> |      |                        |      |              |     |
|                              |      | 571 <sup>‡</sup> (113) |      |              |     |
| <b>Arm</b>                   | A    |                        | 1    |              |     |
|                              | B    |                        | 0.91 | 0.58 to 1.45 | .70 |
|                              | C    |                        | 1.08 | 0.69 to 1.68 | .74 |
| <b>Age, year</b>             | < 50 |                        | 1    |              |     |
|                              | ≥ 50 |                        | 1.56 | 1.00 to 2.45 | .05 |
| <b>T stage</b>               | T3   |                        | 1    |              |     |
|                              | T4   |                        | 1.52 | 1.04 to 2.21 | .03 |
| <b>No. of examined nodes</b> | ≥ 12 |                        | 1    |              |     |
|                              | < 12 |                        | 1.57 | 1.07 to 2.29 | .02 |
| <b>Overall survival</b>      |      |                        |      |              |     |
|                              |      | 571 <sup>‡</sup> (84)  |      |              |     |
| <b>Arm</b>                   | A    |                        | 1    |              |     |
|                              | B    |                        | 0.92 | 0.55 to 1.54 | .75 |
|                              | C    |                        | 0.85 | 0.50 to 1.44 | .55 |
| <b>Age, year</b>             | < 50 |                        | 1    |              |     |
|                              | ≥ 50 |                        | 1.83 | 1.05 to 3.17 | .03 |
| <b>T stage</b>               | T3   |                        | 1    |              |     |
|                              | T4   |                        | 1.57 | 1.01 to 2.44 | .04 |
| <b>No. of examined nodes</b> | ≥ 12 |                        | 1    |              |     |
|                              | < 12 |                        | 1.73 | 1.11 to 2.69 | .02 |

<sup>‡</sup>: Two patients had missing data for the number of examined nodes

Abbreviations: HR, hazard ratio; CI, confidence interval

**eFigure 1.** Distribution of Patients According to the Criteria Defining High-Risk Stage II Colon Cancer

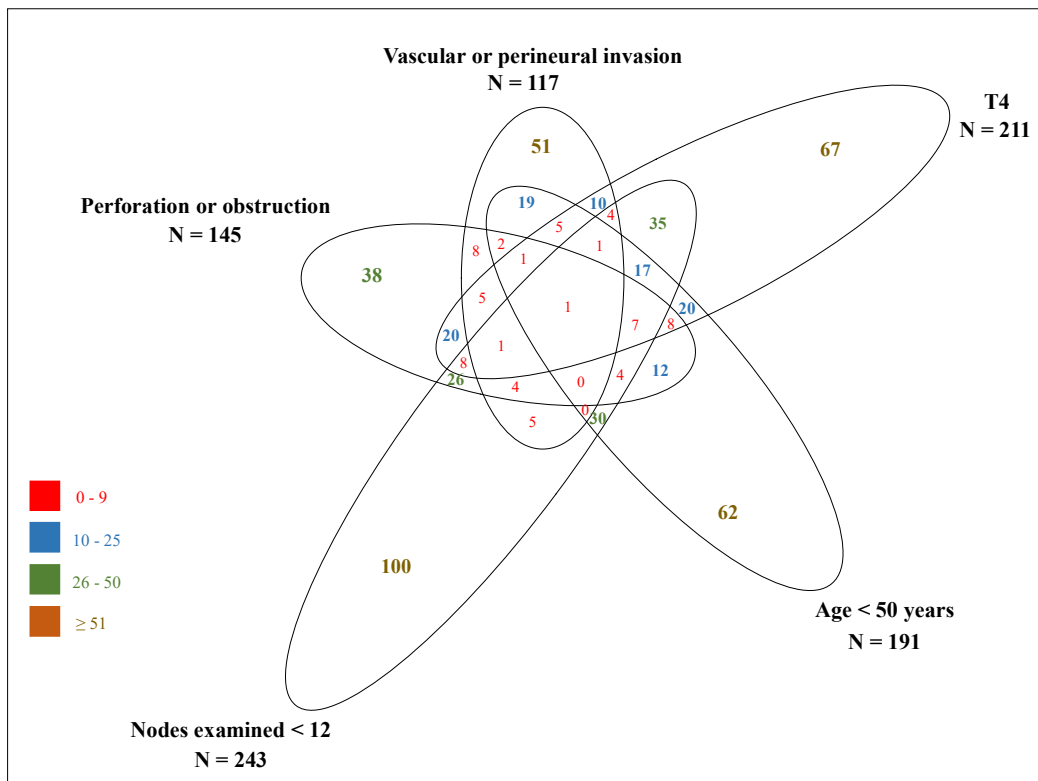

**eFigure 2. Forest Plots for Disease-Free Survival (A) and Overall Survival (B) for FOLFOX4 vs FOLFOX4 with Bevacizumab and Disease-Free Survival (C) and Overall Survival (D) for FOLFOX4 vs XELOX with Bevacizumab**

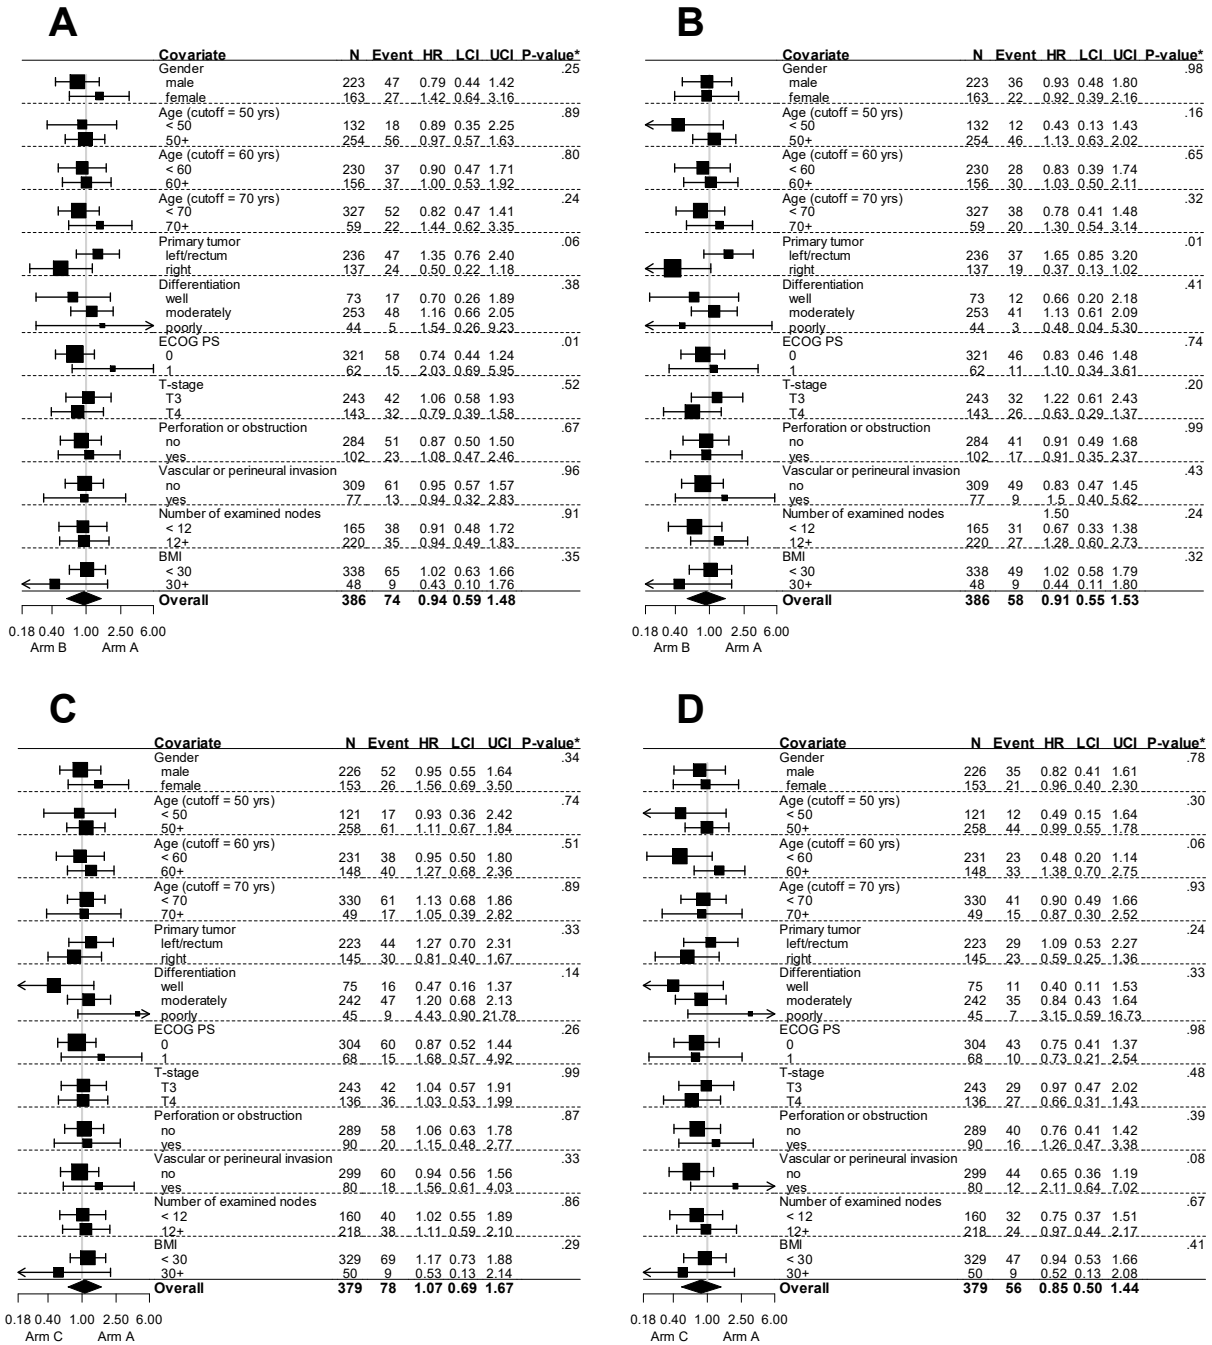

HR, hazard ratio; LCI, UCI, Lower and Upper 95% Confidence Interval; ECOG, Eastern Cooperative Oncology Group; PS, performance status; BMI, body mass index

\*: P-value for the interaction test between the subgroup and treatment arm
