# Supplementary material for: Association of Bevacizumab Plus Oxaliplatin-Based Chemotherapy With Disease-Free Survival and Overall Survival in Patients With Stage II Colon Cancer: A Secondary Analysis of the AVANT Trial
Source: PubMed Central journal article supplement (PMC7573695; doi:10.1001/jamanetworkopen.2020.20425), 2020-10-19
Supplement: jamanetwopen-e2020425-s003.pdf [file jamanetwopen-e2020425-s003.pdf]

## **Data Sharing Statement**

Chibaudel. Association of Bevacizumab Plus Oxaliplatin-Based Chemotherapy With Disease-Free Survival and Overall Survival in Patients With Stage II Colon Cancer. *JAMA Netw Open*. Published October 19, 2020. 10.1001/jamanetworkopen.2020.20425

### **Data**

**Data available:** No
